# Supplementary material for: Chrysoeriol Prevents TNFα-Induced CYP19 Gene Expression via EGR-1 Downregulation in MCF7 Breast Cancer Cells
Source: PubMed Central journal article supplement (PMC7588959; doi:10.3390/ijms21207523), 2020-10-12
Supplement: ijms-21-07523-s001.pdf [file ijms-21-07523-s001.pdf]

**Table S1.** Inhibitory effects of flavonoids on TNF $\alpha$ -induced EGR1 promoter activity

|     | CAS No*    | Common Name                | Structure Name                                     | IA**               |
|-----|------------|----------------------------|----------------------------------------------------|--------------------|
| 1.  | 525-82-6   | Flavone                    | Flavone                                            | 0.5 $\pm$ 0.1      |
| 2.  | 491-78-1   | Primuletin                 | 5-Hydroxyflavone                                   | 6.1 $\pm$ 0.5      |
| 3.  |            |                            | 3,7-Dimethoxyflavone                               | 94.0 $\pm$ 4.3     |
| 4.  | 520-28-5   | Tectochrysin               | 5-Hydroxy-7-Methoxyflavone                         | -115.3 $\pm$ 11.0  |
| b5. | 65548-54-1 |                            | 7,8-Dimethoxyflavone                               | -98.0 $\pm$ 7.3    |
| 6.  | 29550-13-8 | Negletein                  | 5,6-Dihydroxy-7-methoxyflavone                     | -356.7 $\pm$ 111.5 |
| 7.  | 437-64-9   | Genkwanin                  | 5,4'-Dihydroxy-7-methoxyflavone                    | 3.8 $\pm$ 1.2      |
| 8.  | 520-36-5   | Apigenin                   | 5,7,4'-Trihydroxyflavone                           | 64.7 $\pm$ 7.6     |
| 9.  | 491-67-8   | Baicalein                  | 5,6,7-Trihydroxyflavone                            | -27.3 $\pm$ 6.6    |
| 10. | 528-48-3   | Fisetin                    | 3,7,3',4'-Tetrahydroxyflavone                      | 41.3 $\pm$ 6.6     |
| 11. | 491-70-3   | Luteolin                   | 5,7,3',4'-Tetrahydroxyflavone                      | 35.3 $\pm$ 7.4     |
| 12. | 491-71-4   | Chrysoeriol                | 4',5,6-Trihydroxy-3'-methoxyflavone                | 97.0 $\pm$ 2.2     |
| 13. | 529-53-3   | Scutellarein               | 5,6,7,4'-Tetrahydroxyflavone                       | 56.7 $\pm$ 5.4     |
| 14. | 21511-25-1 | Geraldol                   | 3,7,4'-Trihydroxy-3'-methoxyflavone                | 79.7 $\pm$ 7.9     |
| 15. | 491-54-3   | Kaempferide                | 3,5,7-Trihydroxy-4'-methoxyflavone                 | 79.3 $\pm$ 6.9     |
| 16. | 7555-80-8  |                            | 3,5,7,2',4'-Pentamethoxyflavone                    | -4.0 $\pm$ 0.8     |
| 17. | 2306-27-6  | Sinensetin                 | 5,6,7,3',4'-Pentamethoxyflavone                    | 38.0 $\pm$ 6.7     |
| 18. | 520-31-0   | Tricetin                   | 5,7,3',4',5'-Pentahydroxyflavone                   | 74.3 $\pm$ 9.7     |
| 19. | 53350-26-8 | Tricetin pentamethyl ether | 5,7,3',4',5'-Pentamethoxyflavone                   | -28.0 $\pm$ 5.0    |
| 20. | 18103-42-9 | Tricetin trimethylether    | 5,7-Dihydroxy-3',4',5'-trymethoxyflavone           | -81.7 $\pm$ 8.5    |
| 21. | 2196-14-7  |                            | 7,4'-Dihydroxyflavone                              | -61.0 $\pm$ 9.8    |
| 22. | 548-83-4   | Galangin                   | 3,5,7-Trihydroxyflavone                            | 86.3 $\pm$ 11.9    |
| 23. | 90-18-6    | Quercetagenin              | 3,4,6,7,3',4'-Hexahydroxyflavone                   | 80.7 $\pm$ 8.6     |
| 24. | 489-35-0   | Gossypetin                 | 3,5,7,8,3',4'-Hexahydroxyflavone                   | 24.3 $\pm$ 7.8     |
| 25. | 529-44-2   | Myricetin                  | 3,5,7,3',4',5'-Hexahydroxyflavone                  | 89.3 $\pm$ 4.6     |
| 26. | 29043-07-0 |                            | 5,6,7,3',4',5'-Hexamethoxyflavone                  | 55.0 $\pm$ 10.2    |
| 27. | 480-41-1   | Naringenin                 | 5,7,4'-Trihydroxyflavanone                         | 1.4 $\pm$ 0.2      |
| 28. | 10236-47-2 | Naringin                   | 4',5,7-Trihydroxyflavanone 7-rhamnoglucoside       | 70.7 $\pm$ 10.6    |
| 29. | 520-33-2   | Hesperetin                 | 5,7,3'-Trihydroxy-4'-methoxyflavanone              | -32.3 $\pm$ 9.2    |
| 30. | 68745-38-0 | Pinocembrin                | 5,7-Dihydroxyflavanone                             | 43.7 $\pm$ 8.3     |
| 31. | 1036-72-2  | Dimethylpinocembrin        | 5,7-Dimethoxyflavanone                             | -108.7 $\pm$ 5.8   |
| 32. | 552-58-9   | Eriodictyol                | 5,7,3',4'-Tetrahydroxyflavanone                    | -76.7 $\pm$ 5.4    |
| 33. | 13241-32-2 | Neoeriodictin              | Eriodictyol-7-O-neohesperidoside                   | 55.0 $\pm$ 7.3     |
| 34. | 6515-36-2  |                            | 7-Hydroxyflavanone                                 | -28.7 $\pm$ 3.4    |
| 35. | 21785-09-1 |                            | 7-Methoxyflavanone                                 | 14.3 $\pm$ 2.9     |
| 36. | 520-26-3   | Hesperidin                 | 3',5,7-Trihydroxy 4'-methoxyflavanone 7-rutinoside | 81.7 $\pm$ 7.7     |
| 37. | 480-37-5   | Pinostrobin                | 5-Hydroxy-7-methoxyflavanone                       | 45.0 $\pm$ 7.8     |
| 38. | 36052-37-6 | (S)-Alpinetin              | (S)-7-Hydroxy-5-methoxyflavanone                   | -7.3 $\pm$ 1.2     |
| 39. | 2957-21-3  | Sakuranetin                | 5,4'-Dihydroxy-7-methoxyflavanone                  | 43.0 $\pm$ 4.9     |

\* CAS No; Chemical Abstract Service Register Number. \*\* IA: Inhibitory activity (%) of flavonoids against TNF $\alpha$ -induced EGR1 promoter activation. Data value, mean $\pm$ S.D. ( $n = 3$ ); A negative value indicates an increase in TNF $\alpha$ -induced EGR1 promoter activity; A positive value indicates a decrease in TNF $\alpha$ -induced EGR1 promoter activity.
